# Supplementary material for: Backscattering amplitude in ultrasound localization microscopy
Source: PubMed Central journal article supplement (PMC10350458; doi:10.1038/s41598-023-38531-w), 2023-07-16
Supplement: 41598_2023_38531_MOESM1_ESM.pdf [file 41598_2023_38531_MOESM1_ESM.pdf]

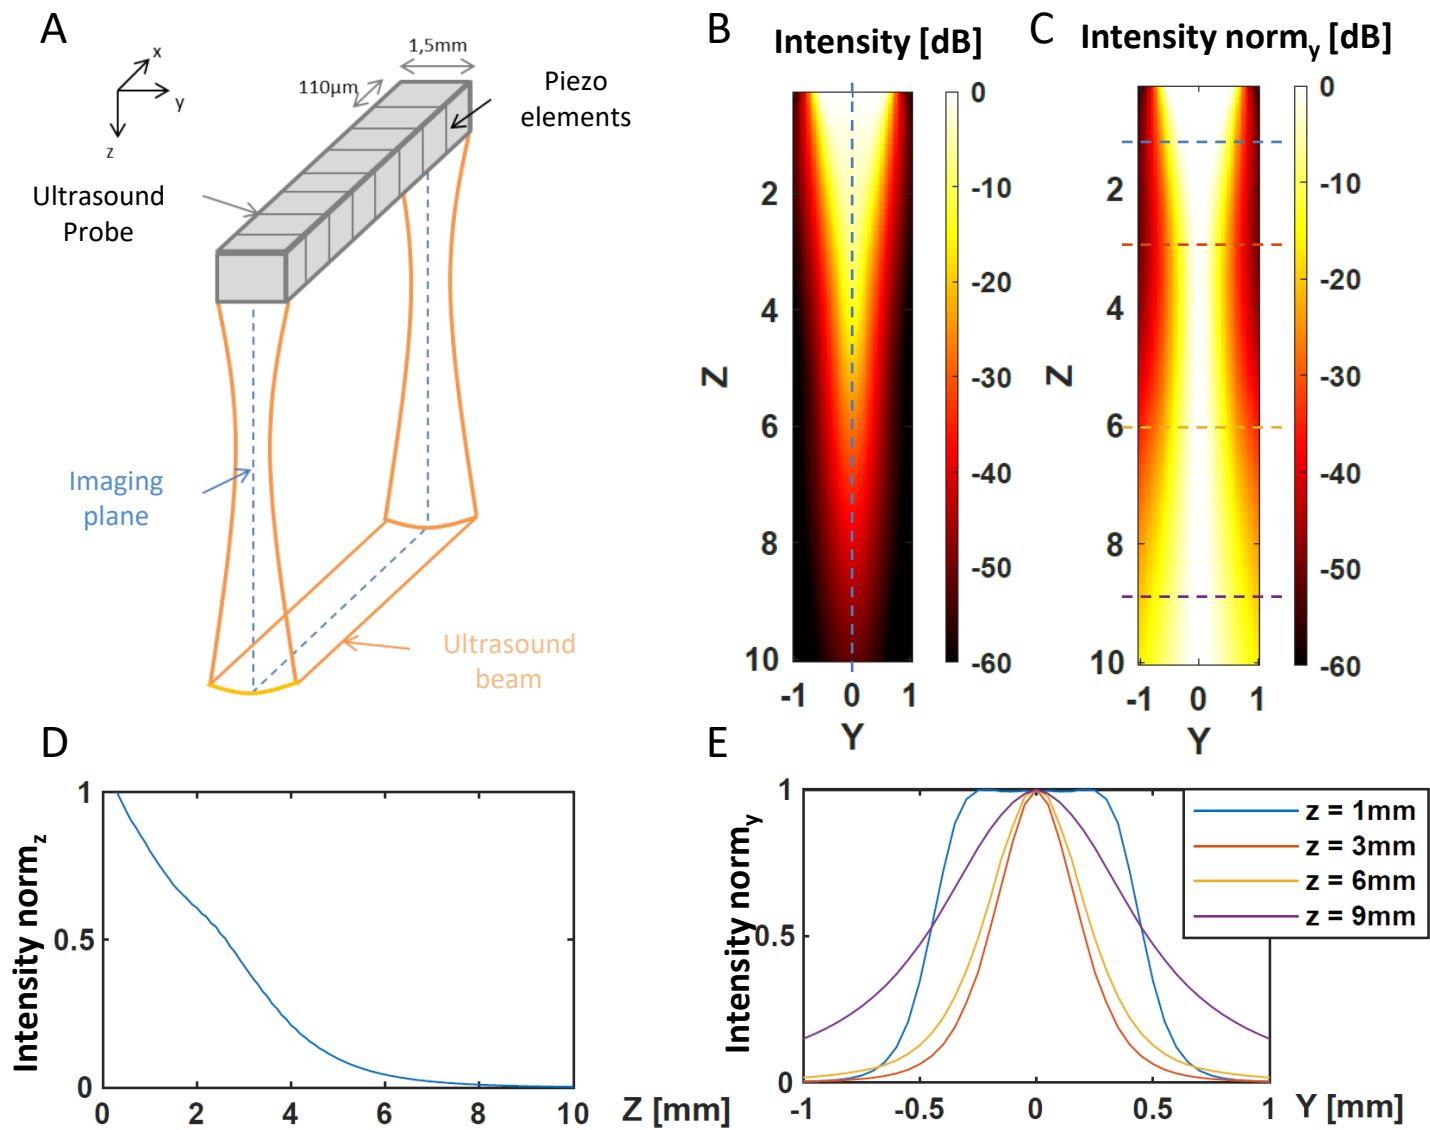

**Figure suppl 1 : Simulation of the ultrasound beam pressure field and Intensity. (A)** Schematic of the ultrasound probe and characteristic spatial dimensions. **(B)** Ultrasound Intensity in the  $YZ$  plane at the  $X$  central position ( $X = 0$ ). **(C)** Ultrasound Intensity in the  $YZ$  plane ( $X = 0$ ) normalized for each depth  $z$ . **(D)** Decrease of ultrasound intensity with depth  $z$  ( $I(x=0, y=0, z)$ ) along the blue dashed line in B). **(E)** Ultrasound intensity profile along  $y$  for a given depth, normalized for each depth as in C (along colored lines in C).
